# Supplementary material
Source: PubMed Central journal article supplement (PMC3571420)
Supplement: gmb-35-1036-s001.pdf [file gmb-35-1036-s001.pdf]

| Subgenera                | Species                                                                         | Data of collection                              | GenBank numbers |             |             |                  |                 |                 |            |
|--------------------------|---------------------------------------------------------------------------------|-------------------------------------------------|-----------------|-------------|-------------|------------------|-----------------|-----------------|------------|
|                          |                                                                                 |                                                 | <i>rbcL</i>     | <i>rps4</i> | <i>trnL</i> | <i>trnL-trnF</i> | <i>nad1 b/c</i> | <i>nad5 d/e</i> | <i>26S</i> |
| <i>Astrophea</i>         | <i>P. amoena</i> L. K. Escobar                                                  | Italy, Ripalta Cremasca, Colection (MV)         | DQ123300        | DQ123407    | DQ123017    | DQ123486         | DQ123214        | DQ123128        | DQ122935   |
|                          | <i>P. arborea</i> Spreng.                                                       | Panama, Blois-France-Greenhouse (RY)            | DQ123301        | DQ123408    | DQ123018    | DQ123487         | DQ123215        | DQ123129        | DQ122936   |
|                          | <i>P. candida</i> (P. & E.) Mast.                                               | Italy, Ripalta Cremasca, Colection (MV)         | DQ123302        | DQ123409    | DQ123019    | N/A              | DQ123216        | DQ123130        | N/A        |
|                          | <i>P. ceratocarpa</i> Silveira                                                  | Brazil, PA (LCB)                                | DQ123303        | DQ123410    | DQ123020    | DQ123488         | DQ123217        | DQ123131        | DQ122937   |
|                          | <i>P. citrifolia</i> (Juss.) Mast.                                              | French Guiana, Ripalta Cremasca, Colection (MV) | DQ123304        | AY212311    | DQ123021    | AY210958         | DQ123218        | DQ123132        | DQ122938   |
|                          | <i>P. haematostigma</i> Mart. ex Mast.                                          | Guaratuba, PR (ACC)                             | DQ123305        | AY212292    | DQ123022    | AY032773         | DQ123219        | DQ123133        | DQ122939   |
|                          | <i>P. kawensis</i> Feuillet                                                     | French Guiana, Blois-France-Greenhouse (RY)     | DQ123306        | DQ123411    | DQ123023    | DQ123489         | DQ123220        | DQ123134        | DQ122940   |
|                          | <i>P. lindeniana</i> Tr. & Pl.                                                  | Italy, Ripalta Cremasca, Colection (MV)         | DQ123307        | DQ123412    | DQ123024    | DQ123490         | DQ123221        | DQ123135        | DQ122941   |
|                          | <i>P. macrophylla</i> Spruce ex Mast.                                           | Brazil, Ripalta Cremasca, Colection (MV)        | DQ123308        | AY212313    | DQ123025    | AY210965         | DQ123222        | DQ123136        | DQ122942   |
|                          | <i>P. mansoi</i> (Mart.) Mast.                                                  | Brazil, MS (ACC)                                | DQ123309        | AY212307    | DQ123026    | AY102401         | DQ123223        | DQ123137        | DQ122943   |
|                          | <i>P. pittieri</i> Mast.                                                        | Italy, Ripalta Cremasca, Colection (MV)         | DQ123310        | DQ123413    | DQ123027    | DQ123491         | DQ123224        | DQ123138        | DQ122944   |
|                          | <i>P. rhamnifolia</i> Mast.                                                     | Brazil, RJ (TSN)                                | DQ123299        | DQ123406    | DQ123016    | DQ123485         | DQ123213        | DQ123127        | N/A        |
| <i>Decaloba</i>          | <i>P. multiflora</i> L.                                                         | Dominica, Ripalta Cremasca, Colection (MV)      | DQ123297        | DQ123404    | DQ123014    | AY210967         | DQ123211        | DQ123125        | DQ122933   |
|                          | <i>P. penduliflora</i> Bertero ex DC.                                           | Blois-France-Greenhouse (RY)                    | DQ123298        | DQ123405    | DQ123015    | DQ123484         | DQ123212        | DQ123126        | DQ122934   |
|                          | <i>P. capsularis</i> L.                                                         | Brazil, PR (ACC)                                | DQ123312        | DQ123415    | DQ123029    | AY032775         | DQ123226        | DQ123140        | DQ122946   |
|                          | <i>P. coriacea</i> Juss.                                                        | Colombia, Ripalta Cremasca, Colection (MV)      | DQ123313        | DQ123416    | DQ123030    | AY210959         | DQ123227        | DQ123141        | DQ122947   |
|                          | <i>P. guatemalensis</i> Wats.                                                   | GenBank numbers                                 | N/A             | N/A         | DQ087428    | DQ087428         | N/A             | N/A             | N/A        |
|                          | <i>P. helleri</i> Peyer                                                         | Mexico, Ripalta Cremasca, Colection (MV)        | DQ123314        | DQ123417    | DQ123031    | AY210962         | DQ123228        | DQ123142        | DQ122948   |
|                          | <i>P. herbertiana</i> Ker-Gawl.                                                 | GenBank numbers                                 | N/A             | N/A         | AY632736    | AY632736         | N/A             | N/A             | N/A        |
|                          | <i>P. holocericea</i> L.                                                        | GenBank numbers                                 | N/A             | N/A         | DQ087426    | DQ087426         | N/A             | N/A             | N/A        |
|                          | <i>P. lobbi</i> subsp. <i>ayaucuchoensis</i> Skrabal & Weigend <sup>2</sup>     | Peru, Kew Botanical Garden (MC)                 | DQ123315        | DQ123419    | DQ123032    | DQ123493         | N/A             | N/A             | N/A        |
|                          | <i>P. lobbi</i> subsp. <i>obtusiloba</i> (Mast.) Skrabal & Weigend <sup>2</sup> | Peru, Kew Botanical Garden (MC)                 | DQ123316        | DQ123418    | DQ123033    | DQ123494         | DQ123229        | DQ123143        | N/A        |
|                          | <i>P. micropetala</i> Mast.                                                     |                                                 | DQ445924        | DQ445930    | N/A         | DQ445933         | DQ832321        | DQ857319        | DQ445918   |
|                          | <i>P. misera</i> HBK.                                                           | Brazil, RS (PASS)                               | DQ123317        | DQ123420    | DQ123034    | AY032777         | DQ123230        | DQ123144        | DQ122949   |
|                          | <i>P. morifolia</i> Mast. in Mart.                                              | Brazil, RS (PASS)                               | DQ123318        | AY212314    | DQ123035    | AY032780         | DQ123231        | DQ123145        | DQ122950   |
|                          | <i>P. organensis</i> Gardn.                                                     | Brazil, PR (ACC)                                | DQ123319        | DQ123421    | DQ123036    | AY032779         | DQ123232        | DQ123146        | DQ122951   |
|                          | <i>P. ornithoura</i> Mast.                                                      | Guatemala, Ripalta Cremasca, Colection (MV)     | DQ123320        | DQ123422    | DQ123037    | AY210968         | DQ123233        | DQ123147        | DQ122952   |
|                          | <i>P. pohlii</i> Mast. in Mart.                                                 | Brazil, MG (ACC)                                | DQ123321        | DQ123423    | DQ123038    | AY032778         | DQ123234        | DQ123148        | DQ122953   |
|                          | <i>P. podlechii</i> Skrabal & Weigend                                           | Peru, Ripalta Cremasca, Colection (MC)          | N/A             | DQ123403    | DQ123013    | DQ123483         | DQ123210        | N/A             | N/A        |
| <i>P. punctata</i> L.    | Peru, Ripalta Cremasca, Colection (MV)                                          | DQ123322                                        | DQ123424        | DQ123039    | AY210969    | DQ123235         | N/A             | DQ122954        |            |
| <i>P. rufa</i> Feuillet  | French Guiana, Ripalta Cremasca, Colection (MV)                                 | DQ123323                                        | AY212315        | DQ123041    | AY210971    | DQ123236         | DQ123149        | DQ122955        |            |
| <i>P. sexflora</i> Juss. | Dominican Republic, Ripalta Cremasca, Colection (MV)                            | DQ123324                                        | DQ123426        | DQ123042    | AY210974    | DQ123237         | DQ123150        | DQ122956        |            |

|                   |                                                    |                                                                     |          |          |          |          |          |          |          |
|-------------------|----------------------------------------------------|---------------------------------------------------------------------|----------|----------|----------|----------|----------|----------|----------|
|                   | <i>P. suberosa</i> L.                              | Brazil, RS (PASS)                                                   | DQ123325 | DQ123427 | DQ123043 | AY032774 | DQ123238 | DQ123151 | DQ122957 |
|                   | <i>P. talamancensis</i> Killip                     | Costa Rica, Ripalta Cremasca, Colection (MV)                        | DQ123326 | DQ123428 | DQ123044 | AY210976 | DQ123239 | DQ123152 | DQ122958 |
|                   | <i>P. tenuiloba</i> Englem.                        | GenBank numbers                                                     | N/A      | N/A      | AY632744 | AY632744 | N/A      | N/A      | N/A      |
|                   | <i>P. tricuspis</i> Mast. in Mart.                 | Brazil, SP (MCD)                                                    | DQ123327 | DQ123429 | DQ123045 | AY102396 | DQ123240 | DQ123153 | DQ122959 |
|                   | <i>P. trifasciata</i> Lemaire                      | Brazil, MG (NFM)                                                    | DQ123328 | DQ123430 | DQ123046 | AY210980 | N/A      | N/A      | N/A      |
|                   | <i>P. truncata</i> Regel                           | Brazil, SC (ACC)                                                    | N/A      | DQ123431 | DQ123047 | AY102390 | N/A      | N/A      | N/A      |
|                   | <i>P. vespertilio</i> L.                           | Brazil, PA (LCB)                                                    | DQ123329 | DQ123432 | DQ123048 | DQ123495 | N/A      | N/A      | N/A      |
|                   | <i>P. xiikzodz</i> MacDougal                       | Italy, Ripalta Cremasca, Colection (MV)                             | DQ123330 | DQ123433 | DQ123049 | AY210975 | DQ123241 | DQ123154 | DQ122960 |
|                   | <i>P. lancetillensis</i> MacDougal & Meerman       | French Guiana, Ripalta Cremasca, Colection (MV)                     | DQ123331 | AY212312 | DQ123050 | AY210963 | DQ123242 | DQ123155 | DQ122961 |
|                   | <i>P. microstipula</i> Gilbert & MacDougal         | Mexico, Ripalta Cremasca, Colection (MV)                            | DQ123332 | DQ123434 | DQ123051 | AY210966 | DQ123243 | DQ123156 | DQ122962 |
|                   | <i>P. murucuja</i> L.                              | Blois-France-Greenhouse (RY)                                        | DQ123345 | DQ123442 | DQ123064 | DQ123501 | DQ123255 | DQ123168 | DQ122974 |
|                   | <i>P. tulae</i> Urban                              | Puerto Rico, Ripalta Cremasca, Colection (MV)                       | DQ123346 | DQ123443 | DQ123065 | AY102392 | DQ123256 | DQ123169 | DQ122975 |
|                   | <i>P. cupraea</i> L.                               | Bahamas, Ripalta Cremasca, Colection (MV)                           | DQ123378 | DQ123459 | DQ123102 | DQ123513 | DQ123274 | DQ123186 | DQ122993 |
|                   | <i>P. tacsonioides</i> Griseb.                     | Blois-France-Greenhouse (RY)                                        | DQ123379 | DQ123461 | DQ123103 | DQ123514 | DQ123275 | DQ123187 | DQ122995 |
|                   | <i>P. sanguinolenta</i> Mast.                      | Ecology & Evolutionary Biology Conservatory, Univ. Connecticut (RY) | N/A      | DQ123462 | DQ123104 | DQ123515 | DQ123276 | DQ123188 | DQ122996 |
| <i>Passiflora</i> | <i>P. racemosa</i> Brot.                           | Brazil, RJ (FCN)                                                    | DQ123311 | DQ123414 | DQ123028 | DQ123492 | DQ123225 | DQ123139 | DQ122945 |
|                   | <i>P. speciosa</i> Gardn.                          | Brazil, MS (ACC)                                                    | DQ123334 | AY212293 | DQ123052 | AY102402 | DQ123244 | DQ123157 | DQ122963 |
|                   | <i>P. vitifolia</i> HBK.                           | Colombia, Ripalta Cremasca, Colection (MV)                          | DQ123335 | DQ123436 | DQ123053 | AY210977 | DQ123245 | DQ123158 | DQ122964 |
|                   | <i>P. clathrata</i> Mast.                          | Brazil, MG (FCN)                                                    | DQ123336 | DQ123437 | DQ123054 | DQ123496 | DQ123246 | DQ123159 | DQ122965 |
|                   | <i>P. foetida</i> L.                               | Brazil, PE (NFM)                                                    | DQ123337 | AY212291 | DQ123055 | AY032763 | DQ123247 | DQ123160 | DQ122966 |
|                   | <i>P. palmeri</i> var. <i>sublanceolata</i> Killip | Italy, Ripalta Cremasca, Colection (MV)                             | DQ123338 | DQ123438 | DQ123056 | DQ123497 | DQ123248 | DQ123161 | DQ122967 |
|                   | <i>P. campanulata</i> Mast.                        | Brazil, PR (ACC)                                                    | DQ123339 | AY212317 | DQ123057 | AY032760 | DQ123249 | DQ123162 | DQ122968 |
|                   | <i>P. clathrata</i> Mast.                          | Brazil, MG (FCN)                                                    | DQ123336 | DQ123437 | DQ123054 | DQ123496 | N/A      | DQ123246 | DQ123159 |
|                   | <i>P. setulosa</i> Killip                          | Brazil, PR (ACC)                                                    | DQ123340 | AY212297 | DQ123058 | AY032761 | DQ123250 | DQ123163 | DQ122969 |
|                   | <i>P. villosa</i> Vell.                            | Brazil, MG (ACC)                                                    | DQ123341 | AY212308 | DQ123059 | AY102403 | DQ123251 | DQ123164 | DQ122970 |
|                   | <i>P. antioquiensis</i> Karst.                     | Italy, Ripalta Cremasca, Colection (MV)                             | DQ123342 | DQ123439 | DQ123060 | DQ123498 | DQ123252 | DQ123165 | DQ122971 |
|                   | <i>P. trisecta</i> Mast.                           | Blois-France-Greenhouse (RY)                                        | DQ123343 | DQ123440 | DQ123061 | DQ123499 | DQ123253 | DQ123166 | DQ122972 |
|                   | <i>P. manicata</i> (Juss.) Pers.                   | Blois-France-Greenhouse (RY)                                        | DQ123344 | DQ123441 | DQ123062 | DQ123500 | DQ123254 | DQ123167 | DQ122973 |
|                   | <i>P. actinia</i> Hook                             | Brazil, RS (PASS)                                                   | DQ123347 | AY212301 | DQ123065 | AY032767 | DQ123257 | DQ123170 | DQ122976 |
|                   | <i>P. alata</i> Curtis                             | Brazil, RS (PASS)                                                   | DQ123348 | AY212323 | DQ123067 | AY032765 | DQ123258 | DQ123171 | DQ122977 |
|                   | <i>P. ambigua</i> Hemsl.                           | Brazil, MT (LCB)                                                    | DQ123349 | DQ123444 | DQ123068 | DQ123503 | DQ123259 | DQ123172 | DQ122978 |
|                   | <i>P. amethystina</i> Mikan                        | Brazil, MG (MCD)                                                    | N/A      | AY212323 | DQ123069 | AY102397 | N/A      | N/A      | N/A      |
|                   | <i>P. caerulea</i> L.                              | Brazil, RS (PASS)                                                   | DQ123350 | AY212316 | DQ123070 | AY032772 | DQ123260 | DQ123173 | DQ122979 |
|                   | <i>P. cincinnata</i> Mast.                         | Brazil, MS (ACC)                                                    | DQ123351 | AY212294 | DQ123071 | AY102400 | DQ123261 | DQ123174 | DQ122980 |

|                                                           |                                                 |          |          |          |          |          |          |          |
|-----------------------------------------------------------|-------------------------------------------------|----------|----------|----------|----------|----------|----------|----------|
| <i>P. edmundoi</i> Sacco                                  | Brazil, BA (NFM)                                | DQ123352 | AY212302 | DQ123072 | AY102399 | DQ123262 | DQ123175 | DQ122981 |
| <i>P. edulis</i> Sims                                     | Brazil, RS (PASS)                               | DQ123353 | AY212303 | DQ123073 | AY032769 | DQ123263 | DQ123176 | DQ122982 |
| <i>P. eichleriana</i> Mast.                               | Brazil, RS (PASS)                               | DQ123354 | AY212304 | DQ123074 | AY102388 | N/A      | N/A      | N/A      |
| <i>P. elegans</i> Mast.                                   | Brazil, RS (PASS)                               | DQ123355 | AY212295 | DQ123075 | AY032766 | DQ123264 | DQ123177 | DQ122983 |
| <i>P. exura</i>                                           | Italy, Ripalta Cremasca, Colection (MV)         | DQ123356 | DQ123445 | DQ123076 | DQ123504 | N/A      | N/A      | N/A      |
| <i>P. gabrielliana</i> sp. new                            | French Guiana, Ripalta Cremasca, Colection (MV) | DQ123357 | AY212319 | DQ123077 | AY210960 | N/A      | N/A      | N/A      |
| <i>P. galbana</i> Mast.                                   | Brazil, PE (NFM)                                | DQ123358 | DQ123446 | DQ123078 | AY032770 | DQ123265 | DQ123178 | DQ122984 |
| <i>P. gardneri</i> Mast.                                  | GenBank numbers                                 | DQ445926 | DQ445932 | N/A      | DQ445935 | N/A      | N/A      | N/A      |
| <i>P. garkey</i> Mast.                                    | French Guiana, Ripalta Cremasca, Colection (MV) | DQ123359 | AY212320 | DQ123079 | AY210961 | N/A      | N/A      | N/A      |
| <i>P. incarnata</i> L.                                    | Brazil, SP (BGJ)                                | DQ123360 | AY212306 | DQ123080 | AY032768 | DQ123266 | DQ123179 | DQ122985 |
| <i>P. ischnoclada</i>                                     | Brazil, PA (LCB)                                | N/A      | DQ123447 | DQ123081 | DQ123505 | N/A      | N/A      | N/A      |
| <i>P. jilekii</i> Wawra                                   | Brazil, SC (ACC)                                | DQ123361 | AY212318 | DQ123082 | AY102387 | DQ123267 | DQ123180 | DQ122986 |
| <i>P. kermesina</i> Link & Otto                           | Brazil, SP (BGJ)                                | N/A      | DQ123448 | DQ123083 | AY032762 | N/A      | N/A      | N/A      |
| <i>P. maliformis</i> L.                                   | Dominica, Ripalta Cremasca, Colection (MV)      | DQ123362 | AY212321 | DQ123084 | AY210964 | DQ123268 | DQ123181 | DQ122987 |
| <i>P. miersii</i> Mast. in Mart.                          | Brazil, SP (PASS)                               | DQ123363 | DQ123449 | DQ123085 | AY102395 | DQ123269 | DQ123182 | DQ122988 |
| <i>P. mucronata</i> Lam.                                  | Brazil, PE (MG)                                 | N/A      | DQ123450 | DQ123086 | DQ123506 | N/A      | N/A      | N/A      |
| <i>P. nitida</i> Kunth                                    | Brazil, MT (LCB)                                | DQ123364 | DQ123451 | DQ123087 | N/A      | N/A      | N/A      | N/A      |
| <i>P. odontophylla</i> Harms ex Glaz.                     | Brazil, MG (FCN)                                | DQ123365 | DQ123452 | DQ123088 | DQ123507 | N/A      | N/A      | N/A      |
| <i>P. quadrangularis</i> L.                               | Brazil, SP (BGJ)                                | DQ123366 | AY212322 | DQ123089 | AY032764 | N/A      | N/A      | N/A      |
| <i>P. recurva</i> Mast in Mart.                           | Brazil, MG (ACC)                                | DQ123367 | AY212310 | DQ123090 | AY102391 | N/A      | N/A      | N/A      |
| <i>P. riparia</i> Mart.                                   | Brazil, PA (LCB)                                | DQ123368 | DQ123453 | DQ123091 | DQ123508 | N/A      | N/A      | N/A      |
| <i>P. serratifolia</i> L.                                 | Surinam, Ripalta Cremasca, Colection (MV)       | DQ123369 | DQ123454 | DQ123092 | AY210973 | N/A      | N/A      | N/A      |
| <i>P. serratodigitata</i> L.                              | Martinique, Ripalta Cremasca, Colection (MV)    | DQ123370 | DQ123455 | DQ123093 | AY210972 | N/A      | N/A      | N/A      |
| <i>P. setacea</i> DC.                                     | Brazil, SP (BGJ)                                | DQ123371 | AY212296 | DQ123094 | AY102398 | N/A      | N/A      | N/A      |
| <i>P. sidaefolia</i> M. Roemer                            | Brazil, MG (MCD)                                | DQ123372 | AY212298 | DQ123095 | AY102394 | DQ123270 | DQ123183 | DQ122989 |
| <i>P. sprucei</i> Mast.                                   | Italy, Ripalta Cremasca, Colection (MV)         | DQ123373 | DQ123456 | DQ123096 | DQ123509 | DQ123271 | DQ123184 | DQ122990 |
| <i>P. trintae</i> Sacco                                   | Brazil, BA (TSN)                                | DQ123375 | DQ123457 | DQ123098 | DQ123510 | N/A      | N/A      | N/A      |
| <i>P. urubicensis</i> Cervi                               | Brazil, SC (ACC)                                | N/A      | AY212300 | DQ123099 | AY102393 | N/A      | N/A      | N/A      |
| <i>P. watsoniana</i> Mast.                                | Brazil, BA (AS)                                 | DQ123376 | DQ123458 | DQ123100 | DQ123511 | N/A      | N/A      | N/A      |
| <i>P. mathewsii</i> (Mast.) Killip                        | Blois-France-Greenhouse (RY)                    | DQ123380 | DQ123463 | DQ123105 | DQ123516 | DQ123277 | DQ123190 | DQ122994 |
| <i>P. mixta</i> L. f.                                     | Blois-France-Greenhouse (RY)                    | DQ123381 | DQ123464 | DQ123106 | DQ123517 | DQ123278 | DQ123191 | DQ122997 |
| <i>P. tripartita</i> var. <i>mollissima</i> (Juss.) Poir. | Blois-France-Greenhouse (RY)                    | DQ123382 | DQ123465 | DQ123107 | DQ123518 | DQ123279 | DQ123192 | DQ122998 |
| <i>P. trifoliata</i> Cav.                                 | Peru, Kew Botanical Garden (MC)                 | DQ123383 | DQ123466 | DQ123108 | DQ123519 | DQ123280 | DQ123193 | N/A      |
| <i>P. luetzelburgii</i> Harms                             | Brazil, BA (TSN)                                | DQ123384 | DQ123467 | DQ123109 | DQ123520 | DQ123281 | DQ123194 | DQ122999 |
| <i>P. reflexiflora</i> Cav.                               | Ecuador, Ripalta Cremasca, Colection (MV)       | DQ123386 | DQ123469 | DQ123111 | AY210970 | DQ123283 | DQ123195 | DQ123001 |

|                           |                                         |                                         |          |          |          |          |          |          |          |
|---------------------------|-----------------------------------------|-----------------------------------------|----------|----------|----------|----------|----------|----------|----------|
|                           | <i>P. umbilicata (Griseb.) Harms</i>    | Blois-France-Greenhouse (RY)            | DQ123387 | DQ123470 | DQ123112 | DQ123521 | DQ123284 | N/A      | DQ123002 |
| <i>Deidamioides</i>       | <i>P. deidamioides Harms</i>            | Brazil, SP (MCD)                        | DQ445925 | DQ445931 | DQ445920 | DQ445934 | DQ832322 | DQ857320 | DQ445919 |
|                           | <i>P. cirrhiflora Juss.</i>             | Italy, Ripalta Cremasca, Colection (MV) | DQ123377 | DQ123459 | DQ123101 | DQ123512 | DQ123273 | DQ123185 | DQ122992 |
|                           | <i>P. ovalis</i>                        | Brazil, BA (TSN)                        | DQ123401 | AY216662 | DQ123122 | AY210978 | DQ123295 | DQ123207 | DQ123010 |
| <i>Tryphostemmatoides</i> | <i>P. tryphostemmatoides Harms</i>      | Blois-France-Greenhouse (RY)            | DQ123388 | DQ123471 | DQ123113 | DQ123522 | N/A      | DQ123285 | DQ123196 |
| <i>Outgroups</i>          | <i>Adenia isoalensis</i>                | Kew Botanical Garden (MC)               | DQ123389 | DQ123472 | DQ123115 | N/A      | DQ123286 | DQ123198 | DQ123004 |
|                           | <i>Adenia keramanthus</i>               | Kew Botanical Garden (MC)               | DQ123390 | DQ123473 | DQ123114 | AY102405 | DQ123287 | DQ123197 | DQ123005 |
|                           | <i>Ancistrothyrsus sp.</i>              | Peru, Kew Botanical Garden (MC)         | DQ123391 | DQ123474 | N/A      | DQ123523 | N/A      | N/A      | N/A      |
|                           | <i>Deidamia sp.</i>                     | Kew Botanical Garden (MC)               | DQ123394 | DQ123477 | DQ123117 | DQ123526 | DQ123289 | DQ123201 | DQ123007 |
|                           | <i>Dilkea cf johannesii Barb. Rodr.</i> | Peru, Kew Botanical Garden (MC)         | DQ123399 | DQ123478 | DQ123118 | DQ123527 | DQ123290 | DQ123202 | DQ123008 |
|                           | <i>Mitostemma brevifilis</i>            | Brazil, MS (ACC)                        | DQ123400 | AY212309 | DQ123119 | AY102386 | DQ123291 | DQ123203 | DQ123009 |
|                           | <i>Barteria sp.</i>                     | Kew Botanical Garden (MC)               | DQ123393 | DQ123476 | DQ123116 | DQ123525 | N/A      | DQ123200 | N/A      |
|                           | <i>Paropsia brazzeana</i>               | Africa, Kew Botanical Garden (MC)       | DQ123396 | DQ123480 | DQ123120 | DQ123528 | DQ123292 | DQ123205 | N/A      |
|                           | <i>Paropsia madagascariensis</i>        | Kew Botanical Garden (MC)               | AF206802 | AY216663 | DQ123121 | AY102404 | DQ123293 | DQ123206 | N/A      |
|                           | <i>Malesherbia linearifolia</i>         | Chile (KG, SK)                          | DQ123402 | DQ123482 | DQ123123 | DQ123529 | DQ123294 | DQ123208 | DQ123011 |
| <i>Turnera subulata</i>   | Brazil, BA (CB)                         | DQ123398                                | N/A      | DQ123124 | DQ123530 | DQ123296 | DQ123209 | DQ123012 |          |
